# Supplementary material for: A novel “turn-on” fluorescent probe for Fe3+in aqueous media based on CN isomerization
Source: Royal Society of Chemistry journal article supplement (doi:10.1039/c2nj40767a), 2012-10-26
Supplement: c2nj40767a.pdf [file c2nj40767a.pdf]

## Supplementary Data for

### A novel “turn-on” fluorescent probe for Fe<sup>3+</sup> in aqueous media based on C=N isomerization

Huajie Xu,<sup>a</sup> Zhaodi Liu,<sup>\*a</sup> Liangquan Sheng,<sup>a</sup> Mingming Chen,<sup>a,b</sup> Deqian Huang,<sup>a</sup> Hong Zhang,<sup>a</sup> Chongfu Song,<sup>a</sup> and Shuisheng Chen,<sup>a</sup>

<sup>a</sup>*Department of Chemistry, Fuyang Normal College, Fuyang, China. Fax:(+86-558-2593836); Tel: (+86-558-2593836); E-mail: zhaodi\_liu@163.com.*

<sup>b</sup>*Department of Chemistry, Anhui University, Hefei, China.*

## Supporting information

1. Materials and instruments
2. Synthesis and characterization
3. Crystal structure determination of L
4. Calculation of binding constant
5. Fig S1-S5

## 1. Materials and instruments

All the materials and solvents were purchased from commercial suppliers and used without further purification. The solution of metal ions were prepared from chloride salts of  $\text{Ni}^{2+}$ ,  $\text{Fe}^{3+}$ ,  $\text{Cu}^{2+}$ ,  $\text{Mn}^{2+}$ ,  $\text{Hg}^{2+}$ ,  $\text{Na}^+$ ,  $\text{Ca}^{2+}$ ,  $\text{Zn}^{2+}$ ,  $\text{Mg}^{2+}$ ,  $\text{Pb}^{2+}$ ,  $\text{K}^+$ ,  $\text{Co}^{2+}$ ,  $\text{Li}^+$ ,  $\text{Cd}^{2+}$ ,  $\text{Cr}^{3+}$ ,  $\text{Al}^{3+}$ ,  $\text{Sr}^{2+}$ ,  $\text{Ba}^{2+}$ , and nitrate salts of  $\text{Ag}^+$ . Stock solutions of metal ions (20 mM) were prepared in deionized water.

A stock solution of **L** (200  $\mu\text{M}$ ) was prepared in  $\text{CH}_3\text{CN}$ . In selectivity experiments, the test samples were prepared by appropriate amount of metal ion stock into 3 mL solution of **L** (20  $\mu\text{M}$ ). Absorbance spectra measurements were measured on a Purkinje general UV-1901 spectrophotometer. Fluorescence spectra measurements were performed on a Cary Eclipse fluorescence spectrophotometer.  $^1\text{H}$ -NMR,  $^{13}\text{C}$ -NMR spectra were obtained on a Bruker Avance 400 MHz NMR spectrometer with tetramethylsilane (TMS) as internal standard. X-ray data were collected on Bruker Smart APEX II CCD diffractometer with graphite-monochromated Mo  $\text{K}\alpha$  ( $\lambda = 0.71073 \text{ \AA}$ ) radiation.

## 2. Synthesis and characterization of **L**

A solution of chromone-3-carboxaldehyde (0.34 g, 2 mmol) and 4-Aminoantipyrine (0.40 g, 2 mmol) in 30 mL ethanol was stirred at 50  $^\circ\text{C}$  for 2 h. After completion of the reaction, the obtained yellow precipitate was filtered and washed several times with cold ethanol. After drying under reduced pressure, the reaction afforded 0.58 g (79%) as a yellow solid.  $^1\text{H}$  NMR (400 MHz,  $d_6$ -DMSO)  $\delta$ : 9.67 (s, 1H), 8.92 (s, 1H), 8.14(d,  $J = 8 \text{ Hz}$ , 1H), 7.85 (t,  $J = 7.2 \text{ Hz}$ , 1H), 7.72 (d,  $J = 8.4 \text{ Hz}$ , 1H), 7.52-7.56 (m, 4H), 7.39 (t,  $J = 6 \text{ Hz}$ , 4H), 3.19 (s, 3H), 2.46 (s, 3H).  $^{13}\text{C}$  NMR (100 MHz,  $d$ - $\text{CDCl}_3$ ) :  $\delta$  (ppm) 175.83, 160.52, 156.18, 154.68, 151.71, 150.47, 134.79, 133.65, 129.19, 126.29, 125.49, 124.65, 124.36, 122.18, 118.91, 118.22, 35.87, 10.18. MALDI-TOF MS: ( $[\text{M} + \text{H}]^+$ ), 360.204.

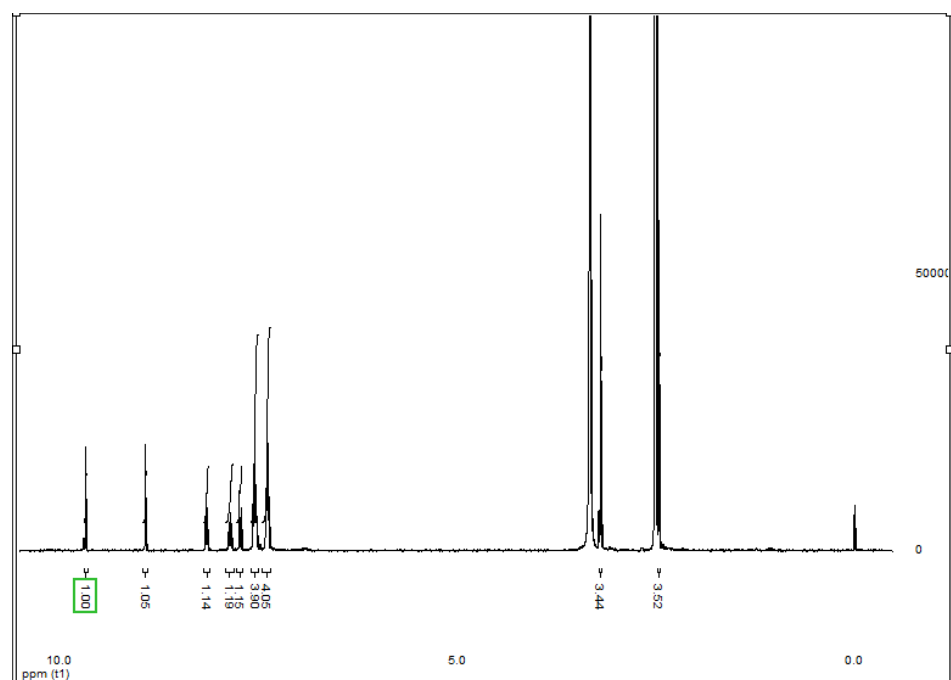

<sup>1</sup>H NMR spectrum of L in *d*<sub>6</sub>-DMSO

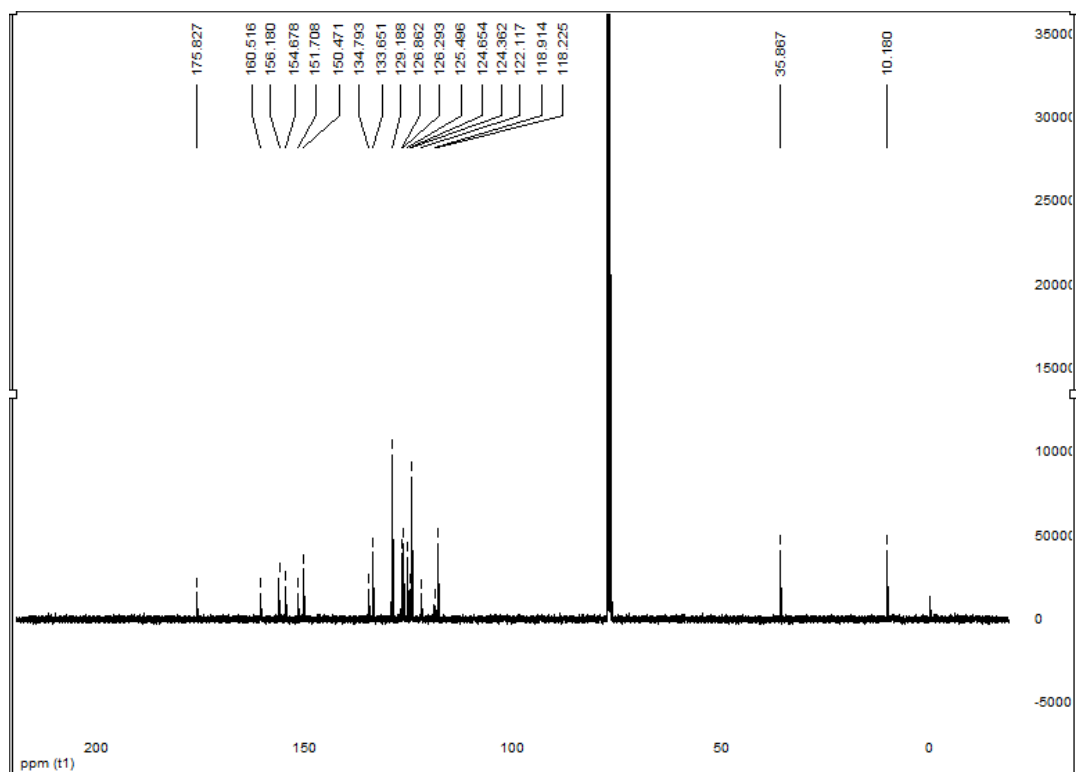

<sup>13</sup>C NMR spectrum of L in *d*-CDCl<sub>3</sub>

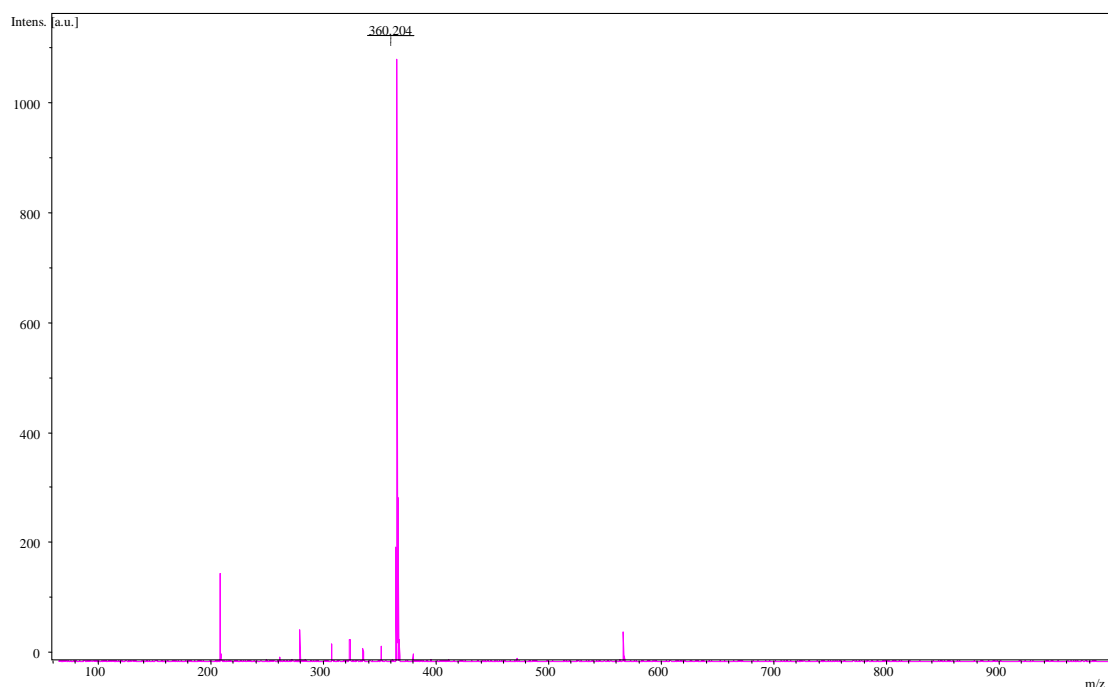

MALDI-TOF MS spectrum of **L**

### 3. Crystal structure determination of **L**

A crystal ( $0.2 \times 0.2 \times 0.1$  mm) was mounted on Bruker Smart APEX II CCD equipped with graphite-monochromated Mo K $\alpha$  ( $\lambda = 0.71073$  Å) radiation. The  $T_{\max} = 0.991$  and  $T_{\min} = 0.982$ . The relevant crystal data and structural parameters are: fw 359.38; space group R-3 is trigonal;  $a = b = 34.465(13)$  (Å),  $c = 7.825(3)$  (Å),  $\alpha = \beta = 90^\circ$ ,  $\gamma = 120^\circ$ ;  $V = 8050(5)$  (Å<sup>3</sup>);  $Z = 18$ ;  $\rho = 1.334$  g/cm<sup>3</sup>;  $\mu$  (MoK $\alpha$ ) =  $0.091$  cm<sup>-1</sup>, the intensities were collected at 296(2) K. 13438 reflections were measured and after merging (Rint 0.0215), some 3152 reflections (of which 2409 were labelled as observed) were used in the refinement. The final  $R_1$  ( $R_1 = \sum ||F_o| - |F_c|| / \sum |F_o|$ ) value was 0.0415,  $wR_2$  ( $[\sum (|F_o| - |F_c|)^2 / \sum w |F_o|^2]^{1/2}$ ) value was 0.1007.

### 4 Calculation of binding constant

We estimated the binding constants by using the fluorometric titration data. The equations below was used to calculate the binding constants with stoichiometry of 1:1.

$$\frac{F - F_0}{F_{\text{lim}} - F_0} = \frac{1}{2C_L} \left[ \left( C_L + C_M + \frac{1}{K_s} \right) - \sqrt{\left( C_L + C_M + \frac{1}{K_s} \right)^2 - 4C_L C_M} \right]$$

where  $F$  is the recorded fluorescent intensity,  $F_0$  is the start value without addition of Fe<sup>3+</sup>,  $F_{\text{lim}}$  is

the limiting value,  $C_M$  is the  $\text{Fe}^{3+}$  concentration, and  $C_L$  is the sensor L concentration.

**5 Fig S1-S5**

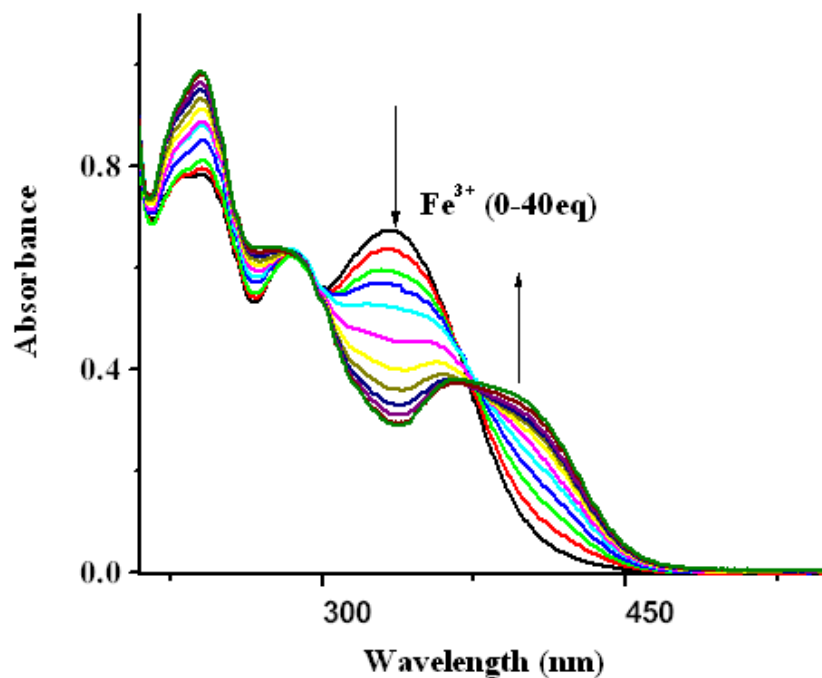

Fig. S1 Uv-Vis spectral changes of L (20  $\mu\text{M}$ ) upon addition of  $\text{Fe}^{3+}$  (40 equiv.) in  $\text{CH}_3\text{CN}$ -water (1/9, v/v).

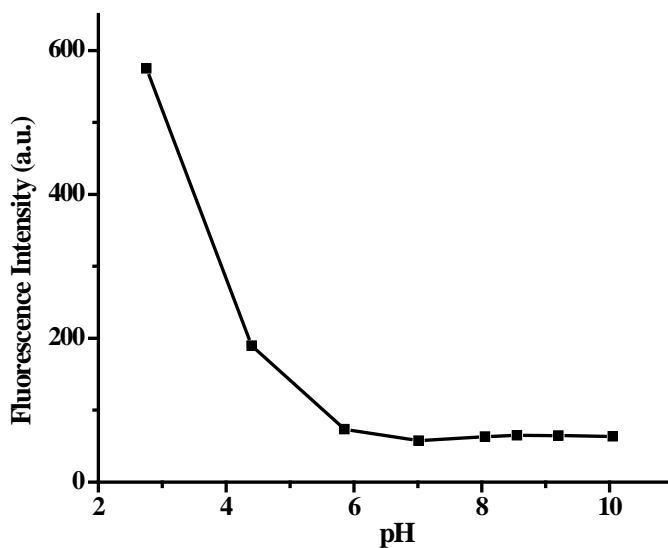

Fig. S2 Fluorescence intensity of L (20  $\mu\text{M}$ ) at 420 nm in  $\text{CH}_3\text{CN}$ -water (1/9, v/v). ( $\lambda_{\text{ex}} = 372$  nm)

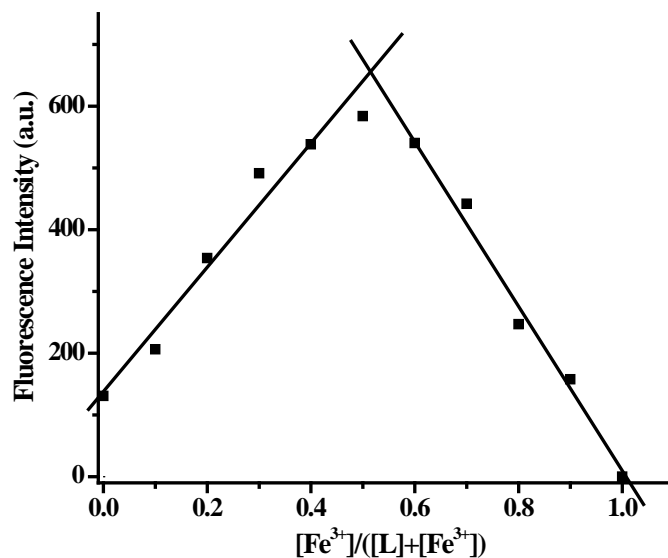

Fig. S3 Job's plots for determination of the stoichiometry of L-Fe<sup>3+</sup> in CH<sub>3</sub>CN-water (1/9, v/v, pH=7.0) solution, indicating the 1:1 stoichiometry for L-Fe<sup>3+</sup> (the total concentration of L and Fe<sup>3+</sup> is 100 μM).

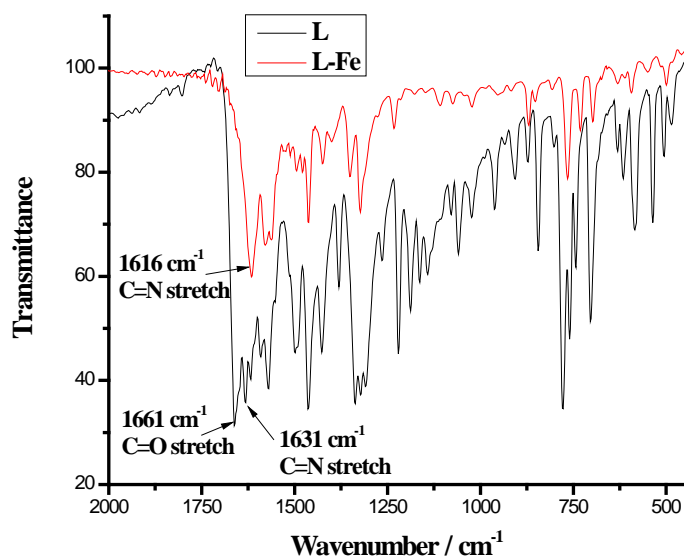

Fig. S4 IR spectra of L and L-Fe<sup>3+</sup>.

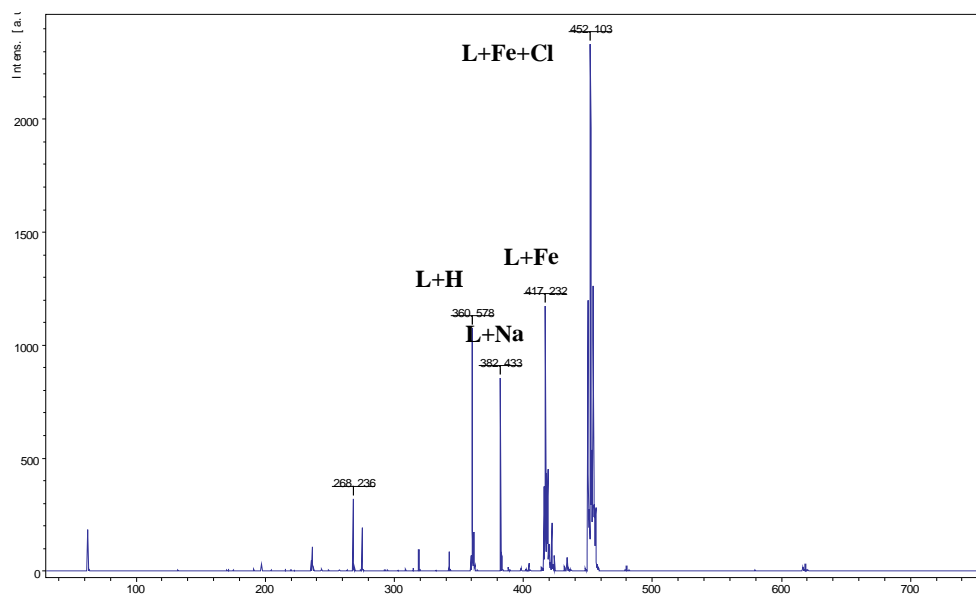

Fig. S5. The MALDI-TOF MS spectra of L in CH<sub>3</sub>CN
